# Supplementary material for: Increased Rates of Mental Health Service Utilization by U.S. College Students
Source: Atypon-hosted journal article supplement (doi:10.1176/appi.ps.201800571), 2019-06-01

Psychiatric admissions and unique patients ages 18-24 admitted to a single psychiatric hospital in a college town in southeastern U.S., 2007-2017.

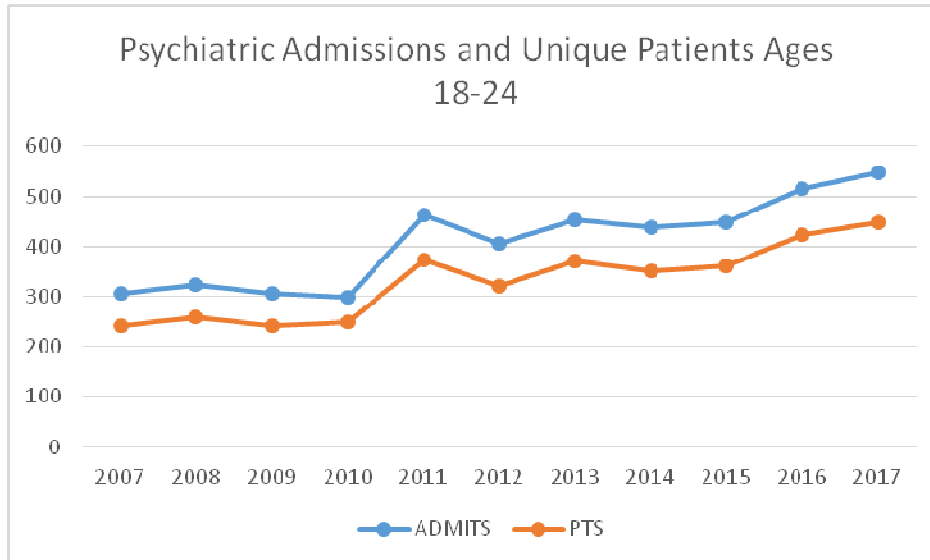

Psychiatric hospitalizations among university students seen by a student health psychiatry service in a college town in southeastern U.S., 2013-2018.

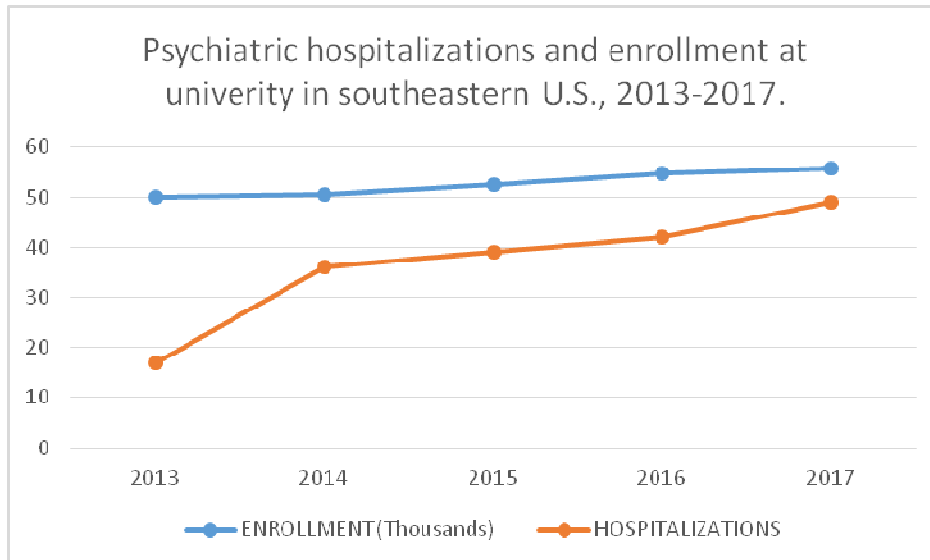

Supplement: appi.ps.201800571.ds001.pdf [file appi.ps.201800571.ds001.pdf]
